# Supplementary material for: Preparation of Mn2O3/MIL-100(Fe) composite and its mechanism for enhancing the photocatalytic removal of rhodamine B in water
Source: Royal Society of Chemistry journal article supplement (doi:10.1039/d1ra03496k), 2021-01-01
Supplement: d1ra03496k1.pdf [file d1ra03496k1.pdf]

## Supplementary Data

### Preparation of $\text{Mn}_2\text{O}_3/\text{MIL-100}(\text{Fe})$ composite and its mechanism for enhancing the photocatalytic removal of Rhodamine B in water under visible light and persulfate activation

Nguyen Trung Dung<sup>1,\*</sup>, Tran Thi Hue<sup>1</sup>, Vu Dinh Thao<sup>1</sup>, Nguyen Nhat Huy<sup>2,3,\*</sup>

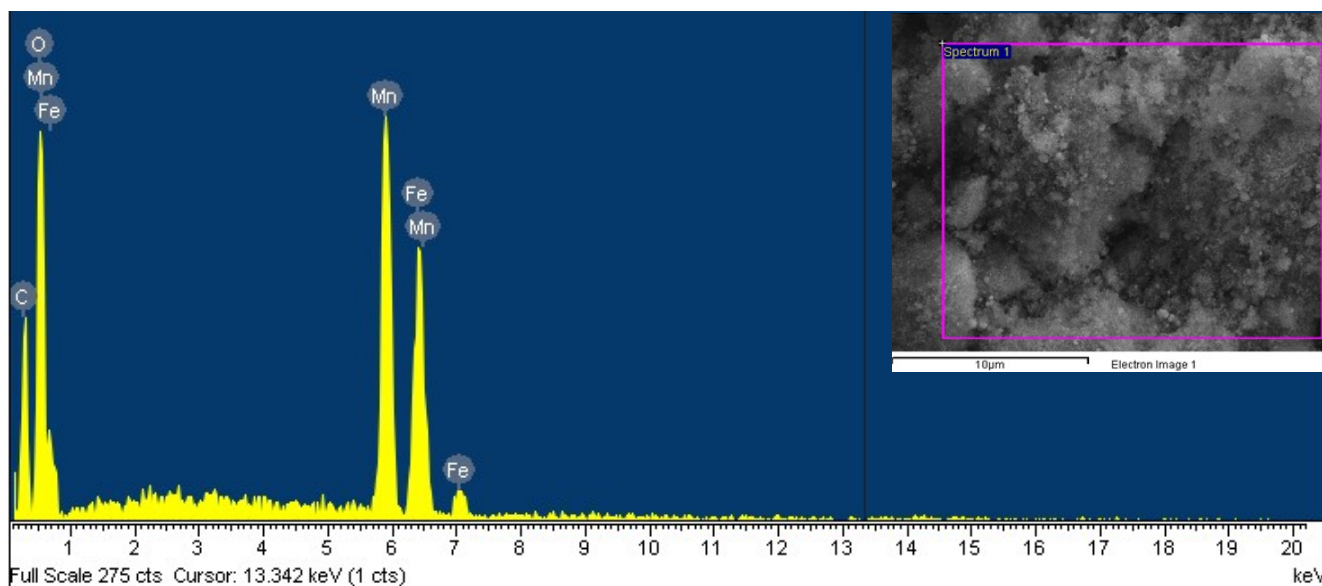

**Figure S1.** EDX spectrum of M100Mn(60:40)

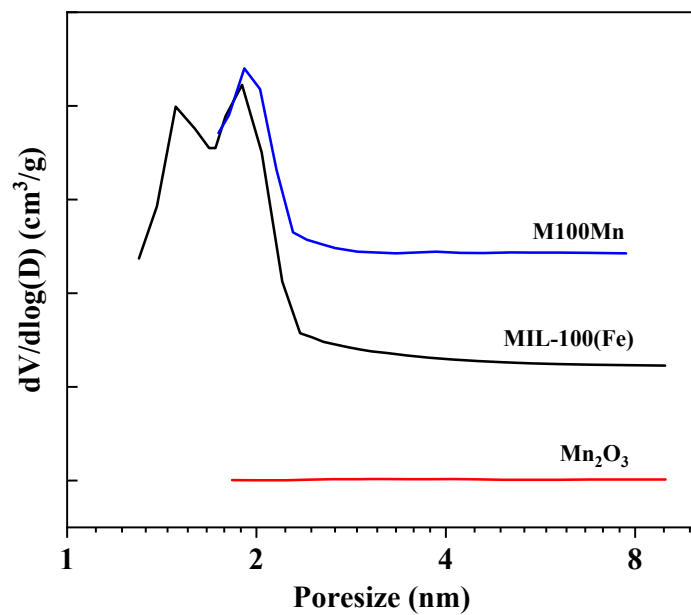

**Figure S2.** Pore size distribution of Mn<sub>2</sub>O<sub>3</sub>, MIL-100(Fe), and M100Mn(60:40) materials

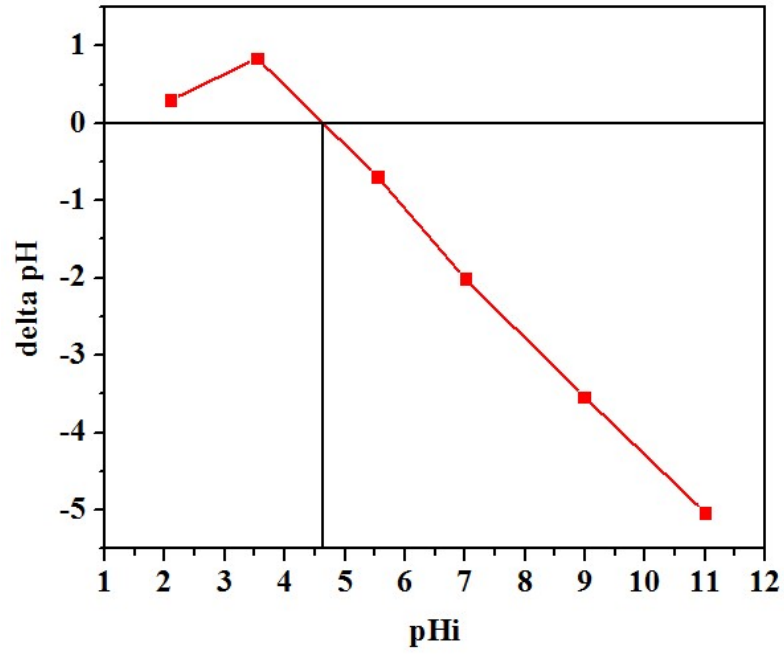

**Figure S3.** Plot for determining the  $\text{pH}_{\text{pzc}}$  of the M100Mn(60:40) material

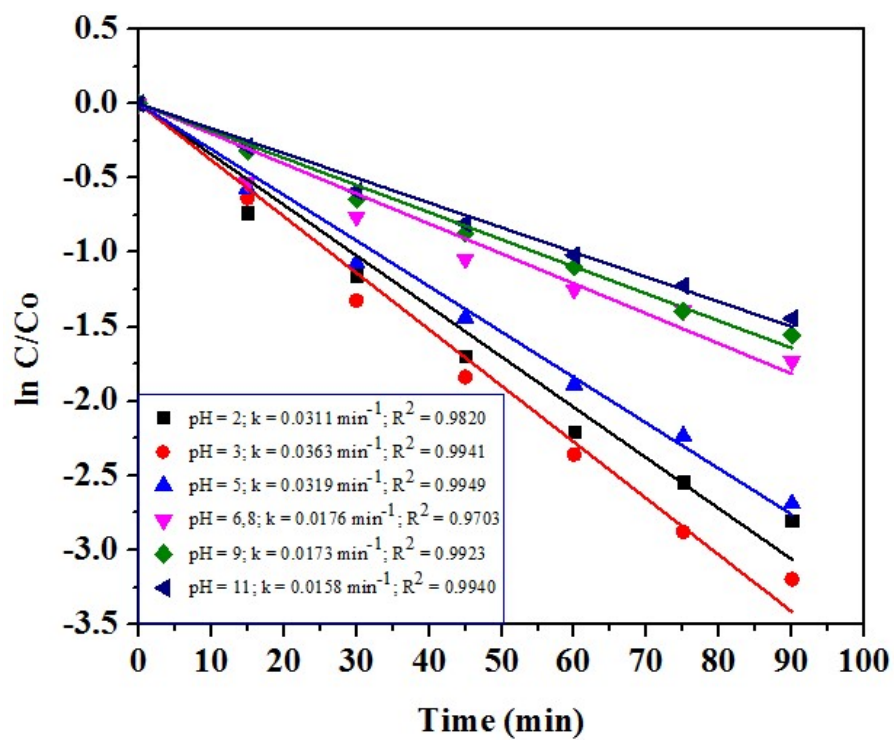

**Figure S4.** Degradation rate constant of RhB by the M100Mn/Na<sub>2</sub>S<sub>2</sub>O<sub>8</sub>/Vis system with different solution pH

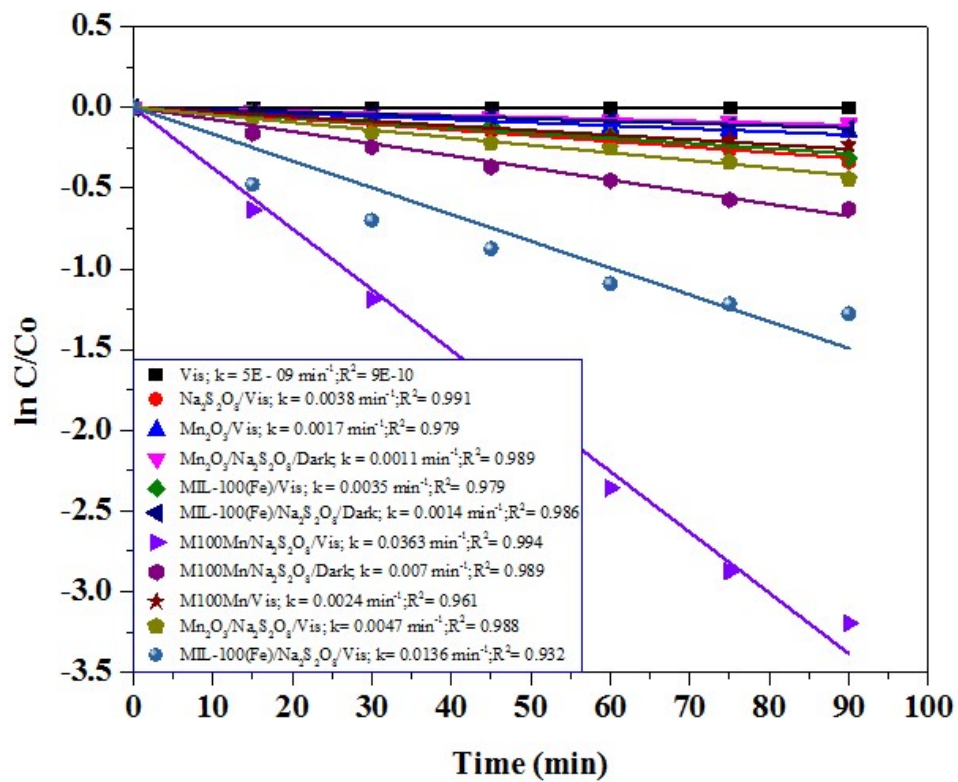

Figure S5. Degradation rate constant of RhB in different reaction systems

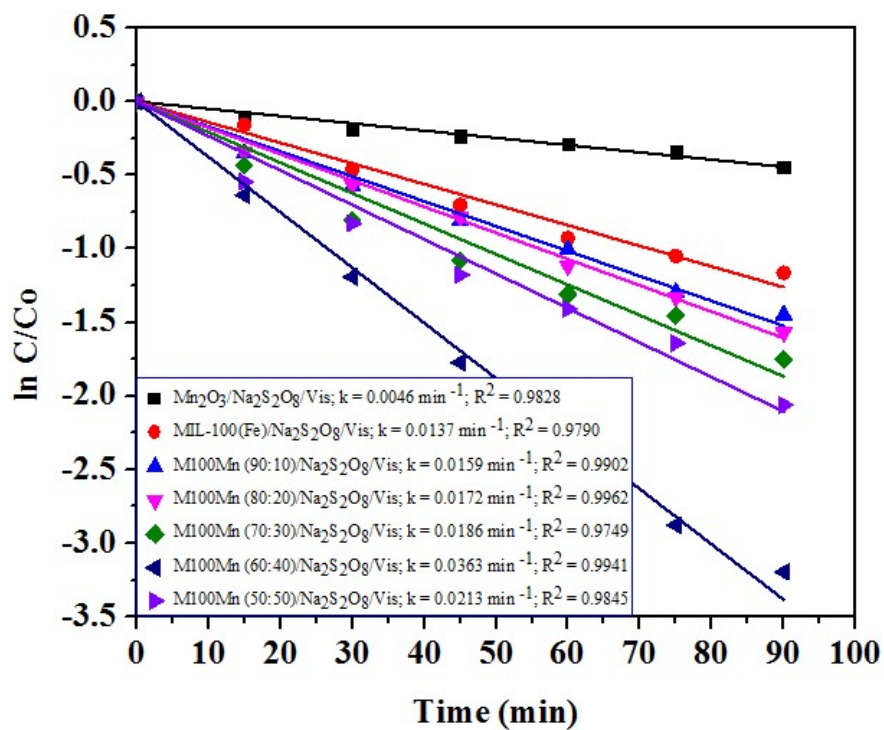

**Figure S6.** Degradation rate constant of RhB by M100Mn composites with different MIL-100(Fe): $\text{Mn}_2\text{O}_3$  ratios

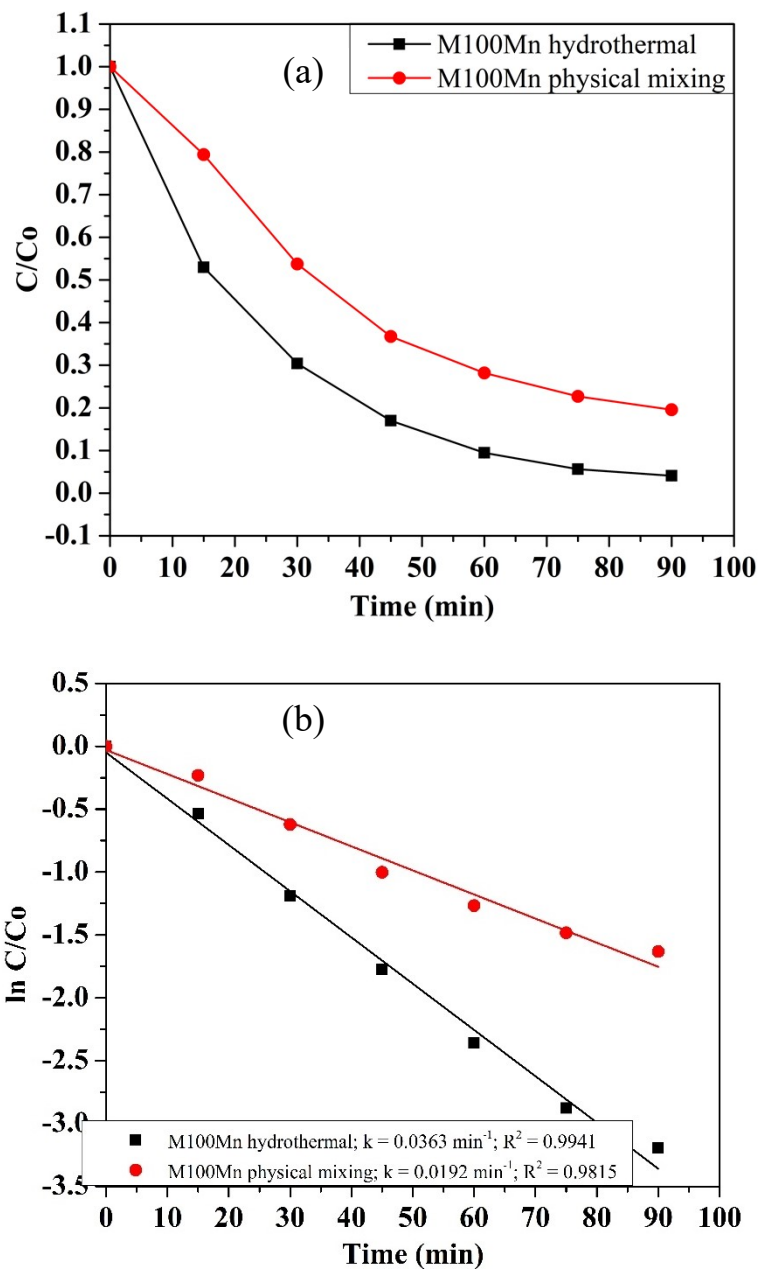

**Figure S7.** RhB degradation efficiency (a) and rate constant (b) using M100Mn(60:40) with hydrothermal synthesis and physical mixing methods.

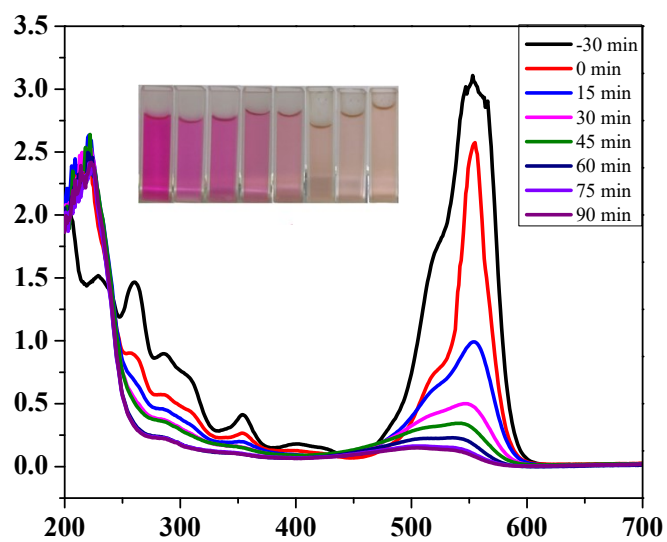

**Figure S8.** UV-Vis spectra of RhB solution during 30 min of adsorption and 90 min of photocatalytic reaction using M100Mn(60:40)



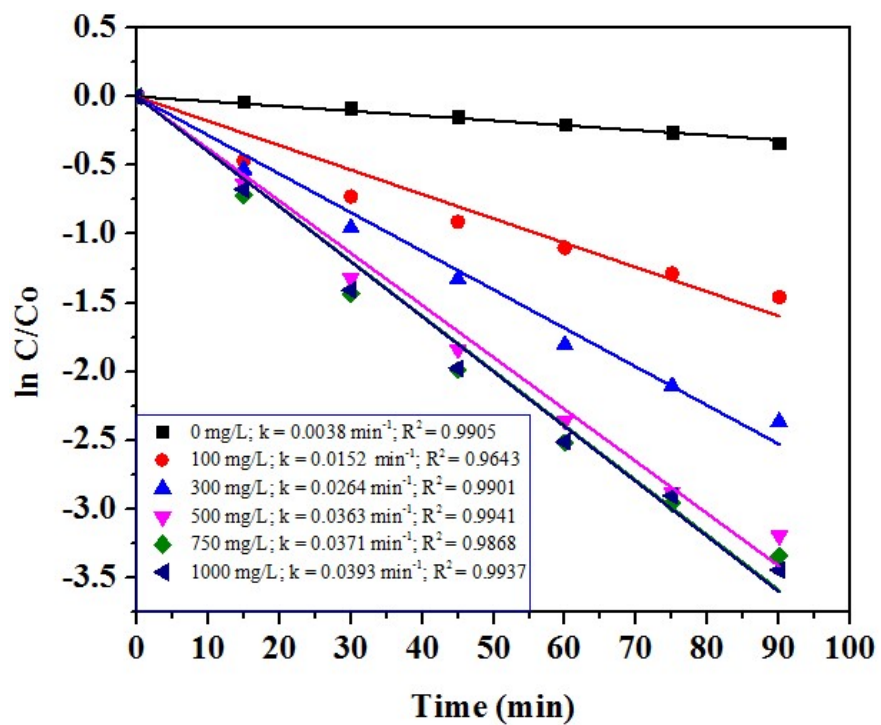

**Figure S9.** Degradation rate constant of RhB at different M100Mn(60:40) dosages

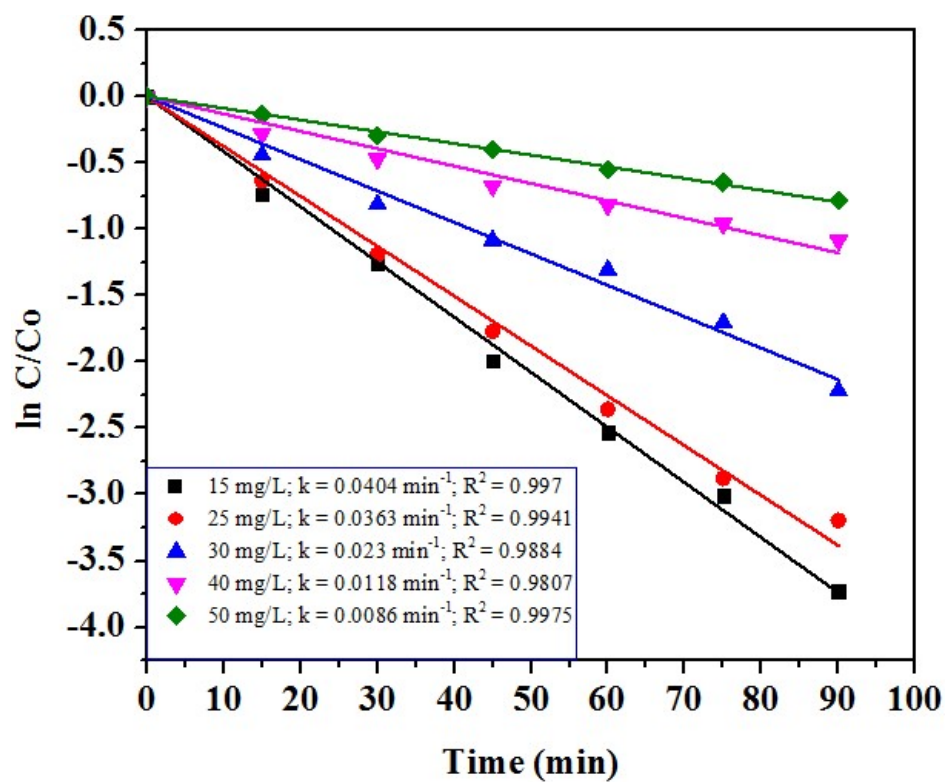

Figure S10. Degradation rate constant of RhB at different initial RhB concentrations

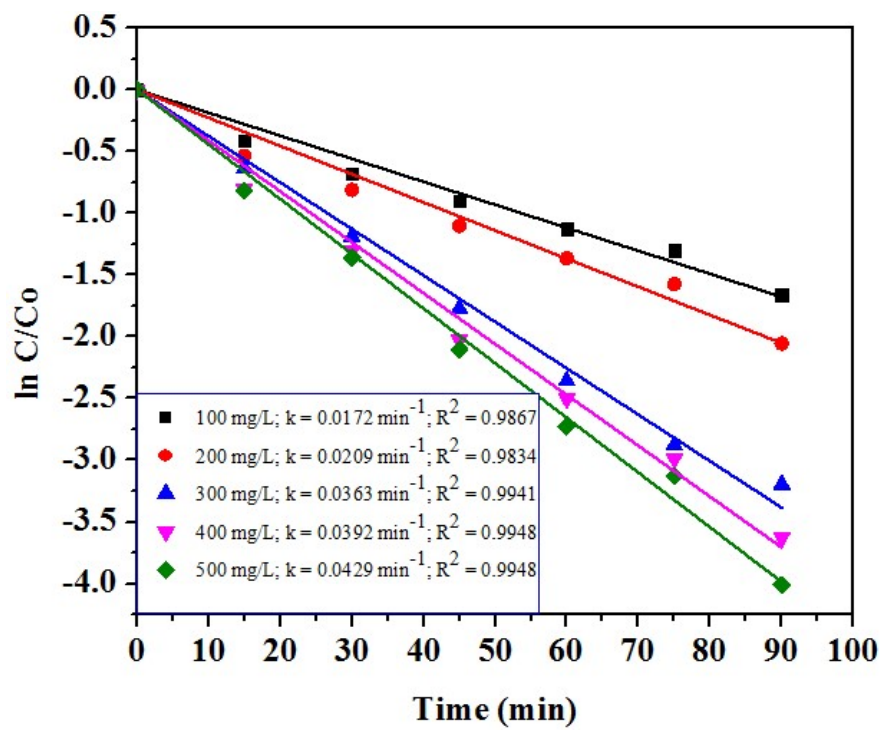

Figure S11. Degradation rate constant of RhB at different Na<sub>2</sub>S<sub>2</sub>O<sub>8</sub> concentrations

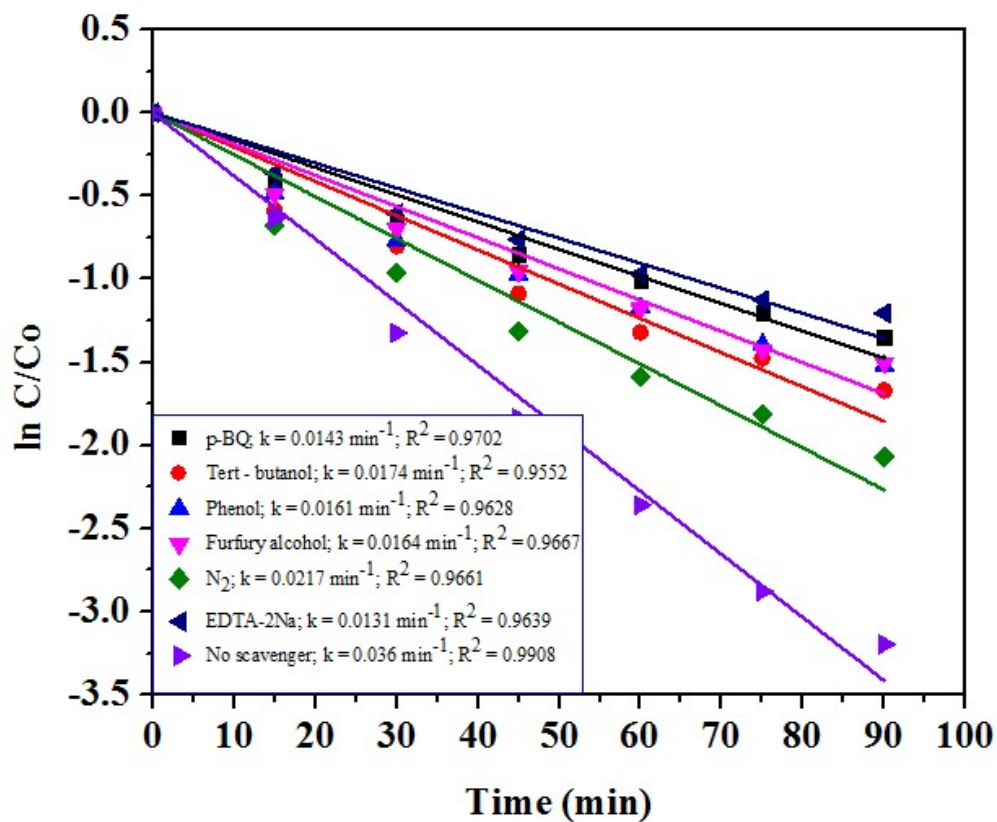

**Figure S12.** Degradation rate constant of RhB under the presence of different radical scavengers
